# Supplementary material for: Distribution and population structure in the naked goby Gobiosoma bosc (Perciformes: Gobiidae) along a salinity gradient in two western Atlantic estuaries
Source: PeerJ. 2018 Aug 7;6:e5380. doi: 10.7717/peerj.5380 (PMC6086083; doi:10.7717/peerj.5380)
Supplement: Table S3 [file peerj-06-5380-s003.xlsx]

## Sheet: Sheet1
Analysis	R2	p
Genetic diversity & Average salinity (linear, ALL DATA)	0.004	0.873
Genetic diversity & Average salinity (linear, NEUSE)	0.01	0.87
Genetic diversity & Average salinity (linear, PAMLICO)	0.477	0.309
Genetic diversity & Average salinity (polynomial (2), ALL DATA)	0.004	0.987
Genetic diversity & Average salinity (polynomial (2), NEUSE)	0.203	0.796
Genetic diversity & Average salinity (polynomial (2), PAMLICO)	0.817	0.428
Genetic diversity & Average salinity (polynomial (3), ALL DATA)	0.049	0.965
Genetic diversity & Average salinity (polynomial (3), NEUSE)	0.897	0.401
Genetic diversity & Average salinity (polynomial (3), PAMLICO)	n/a	n/a
Genetic diversity & Salinity standard deviation (linear, ALL DATA)	0.499	0.034
Genetic diversity & Salinity standard deviation (linear, NEUSE)	0.244	0.398
Genetic diversity & Salinity standard deviation (linear, PAMLICO)	0.798	0.107
Genetic diversity & Salinity standard deviation (polynomial (2), ALL DATA)	0.639	0.047
Genetic diversity & Salinity standard deviation (polynomial (2), NEUSE)	0.548	0.453
Genetic diversity & Salinity standard deviation (polynomial (2), PAMLICO)	0.918	0.286
Genetic diversity & Salinity standard deviation (polynomial (3), ALL DATA)	0.662	0.118
Genetic diversity & Salinity standard deviation (polynomial (3), NEUSE)	0.723	0.631
Genetic diversity & Salinity standard deviation (polynomial (3), PAMLICO)	n/a	n/a
Proportion singletons & Average salinity (linear, ALL DATA)	0.07	0.49
Proportion singletons & Average salinity (linear, NEUSE)	0.157	0.509
Proportion singletons & Average salinity (linear, PAMLICO)	0.401	0.367
Proportion singletons & Average salinity (polynomial (2), ALL DATA)	0.185	0.542
Proportion singletons & Average salinity (polynomial (2), NEUSE)	0.199	0.801
Proportion singletons & Average salinity (polynomial (2), PAMLICO)	0.824	0.42
Proportion singletons & Average salinity (polynomial (3), ALL DATA)	0.21	0.732
Proportion singletons & Average salinity (polynomial (3), NEUSE)	0.352	0.899
Proportion singletons & Average salinity (polynomial (3), PAMLICO)	n/a	n/a
Proportion singletons & Salinity standard deviation (linear, ALL DATA)	0.187	0.248
Proportion singletons & Salinity standard deviation (linear, NEUSE)	0.058	0.697
Proportion singletons & Salinity standard deviation (linear, PAMLICO)	0.724	0.147
Proportion singletons & Salinity standard deviation (polynomial (2), ALL DATA)	0.792	0.009
Proportion singletons & Salinity standard deviation (polynomial (2), NEUSE)	0.647	0.354
Proportion singletons & Salinity standard deviation (polynomial (2), PAMLICO)	0.909	0.302
Proportion singletons & Salinity standard deviation (polynomial (3), ALL DATA)	0.793	0.037
Proportion singletons & Salinity standard deviation (polynomial (3), NEUSE)	0.672	0.688
Proportion singletons & Salinity standard deviation (polynomial (3), PAMLICO)	n/a	n/a
